# Supplementary material for: Inadequate treatment in internships: a comparison between medical and other students
Source: GMS J Med Educ. 2021 Feb 15;38(2):Doc45. doi: 10.3205/zma001441 (PMC7958909; doi:10.3205/zma001441)
Supplement: Figure S4 and table S9 [file JME-38-2-45-s-003.pdf]

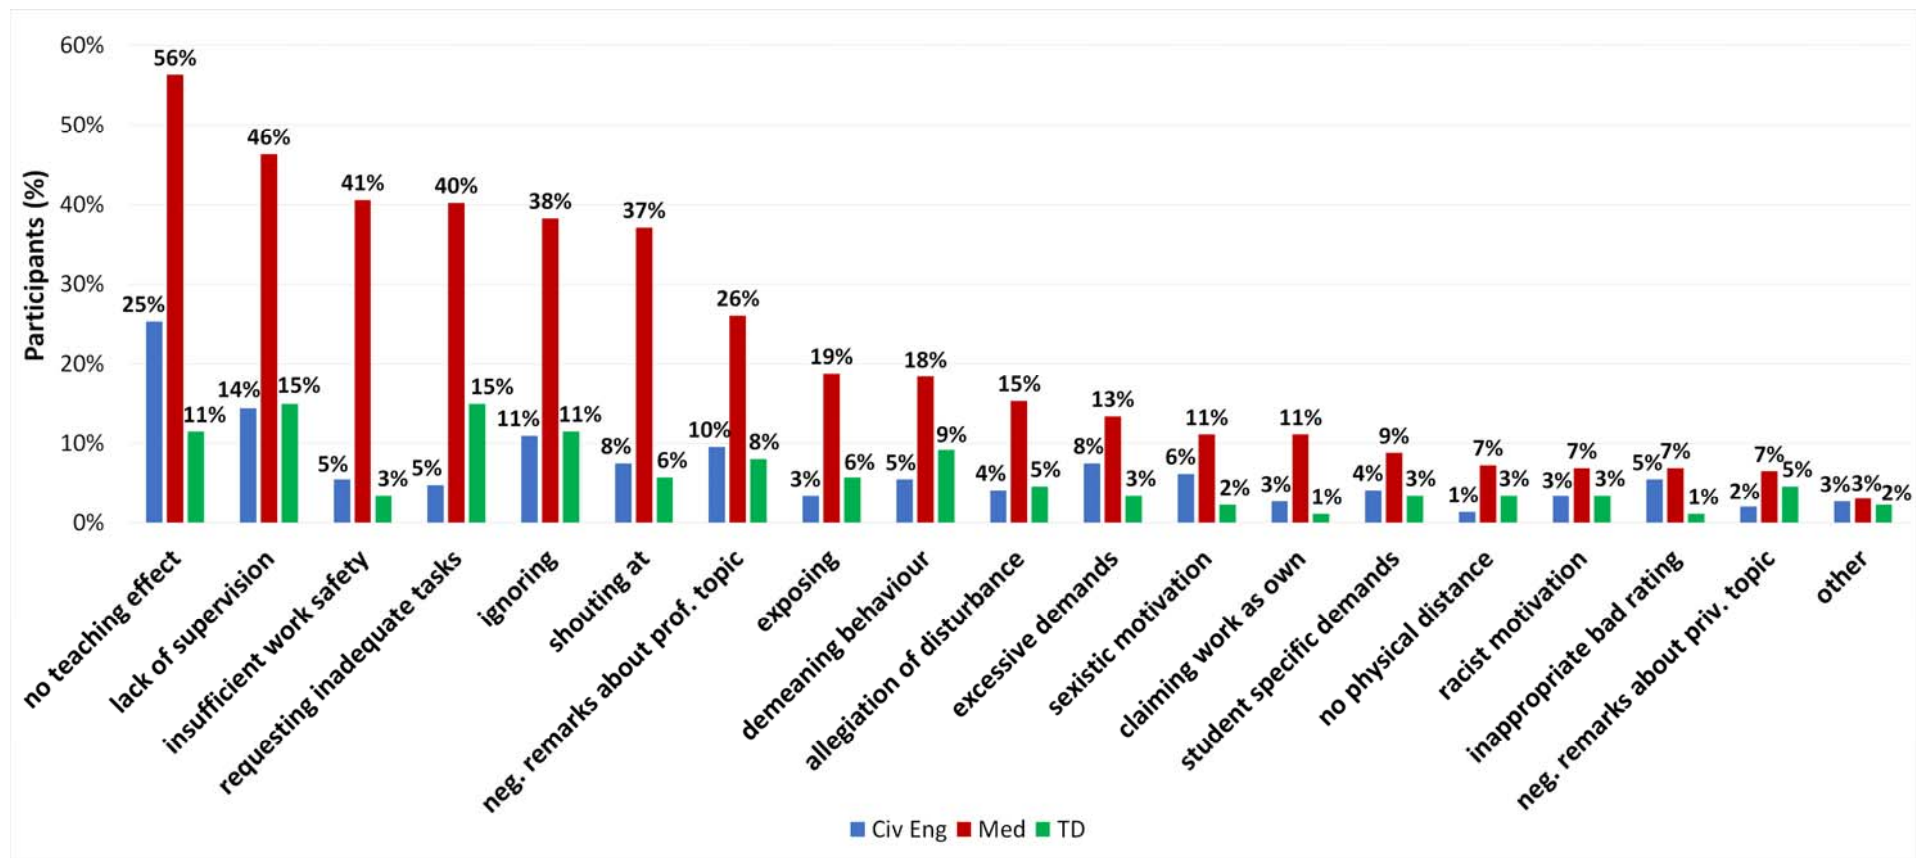

**Figure S4: Comparison of IAT types in the three study programs.** Values are based on all participants = 100%. Multiple answers result in a total > 100%.

**Table S9: Subgroup analysis by sex; the table lists the parameters for the descriptive and comparative statistics.**

|                                                                            | <b>Medicine</b>                                                       |                                                                       | <b>Civil engineering</b>                     |                                                   | <b>Teaching degree</b>                                 |                                            |
|----------------------------------------------------------------------------|-----------------------------------------------------------------------|-----------------------------------------------------------------------|----------------------------------------------|---------------------------------------------------|--------------------------------------------------------|--------------------------------------------|
|                                                                            | <b>female</b>                                                         | <b>male</b>                                                           | <b>female</b>                                | <b>male</b>                                       | <b>female</b>                                          | <b>male</b>                                |
| <b>IATyes, qu. 5:</b><br>- N <sub>IATyes</sub> / N <sub>total</sub><br>- % | * <sub>MedM</sub><br>121/163<br>73%                                   | * <sub>MedF</sub><br>54/90<br>59%                                     | 16/54<br>30%                                 | 27/85<br>32%                                      | 22/62<br>35%                                           | 7/24<br>29%                                |
| <b>Most frequent IAT:</b><br>- 1.<br>- 2.<br>- 3.<br>- 4.                  | * <sub>MedM</sub><br>nte (64%)<br>los (50%)<br>rit (46%)<br>iws (44%) | * <sub>MedF</sub><br>nte (44%)<br>los (39%)<br>iws (34%)<br>rit (32%) | nte (26%)<br>los (17%)<br>ign, sha (9% each) | nte (24%)<br>los (14%)<br>ign, negprof (11% each) | los (15%)<br>rit (14%)<br>nte, ign, negprof (11% each) | los, rit (17% each)<br>nte, ign (13% each) |
| <b>Severity of IAT:</b><br>- not<br>- rather not<br>- rather<br>- severe   | * <sub>MedM</sub><br>20%<br>63%<br>13%<br>0%                          | * <sub>MedF</sub><br>43%<br>42%<br>15%<br>0%                          | 31%<br>63%<br>6%<br>0%                       | 58%<br>27%<br>15%<br>0%                           | 18%<br>41%<br>41%<br>0%                                | 57%<br>43%<br>0%<br>0%                     |

Not all participants indicated their sex, therefore the total number is lower than the of participant total. For sex differences for students of a study program the indices indicate both significance and effect size: \*  $\triangleq$  statistically significant + low effect size; \*\*  $\triangleq$  statistically significant + medium or large effect size; Index indicates the group differences: MedM = male medical students, MedF = female medical students. Abbreviations of IAT types: nte  $\triangleq$  no teaching effect; los  $\triangleq$  lack of supervision; iws  $\triangleq$  insufficient work safety; rit  $\triangleq$  requesting inadequate tasks; ign  $\triangleq$  ignoring; sha  $\triangleq$  shouting at, reprimanding; negprof  $\triangleq$  negative remarks about professional topic
